# Supplementary material
Source: MDPI journal article supplement (https://www.mdpi.com/2227-9717/10/10/2148)
Supplement: s1 [file s1]

## **Straw biochar at different pyrolysis temperatures passivate pyrite by promoting the electron transfer from biochar to pyrite**

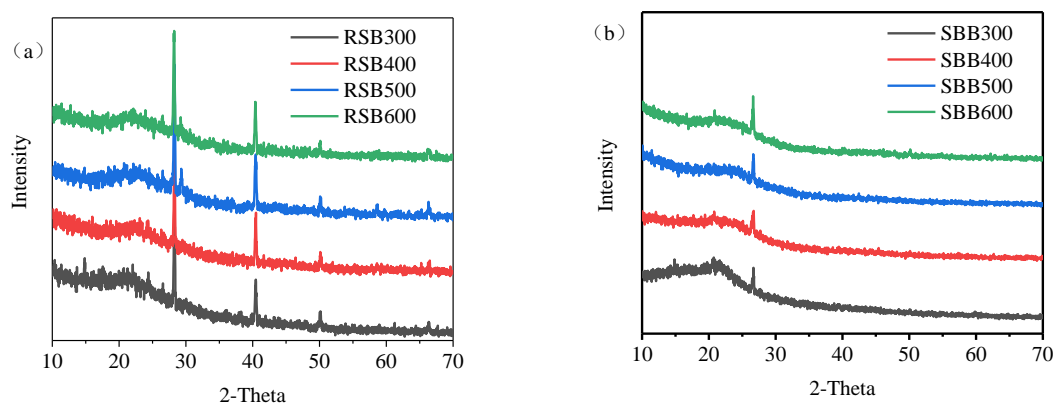

Figure S1 XRD spectra of RSB and SBB at different pyrolysis temperatures: (a) RSB; (b) SBB.

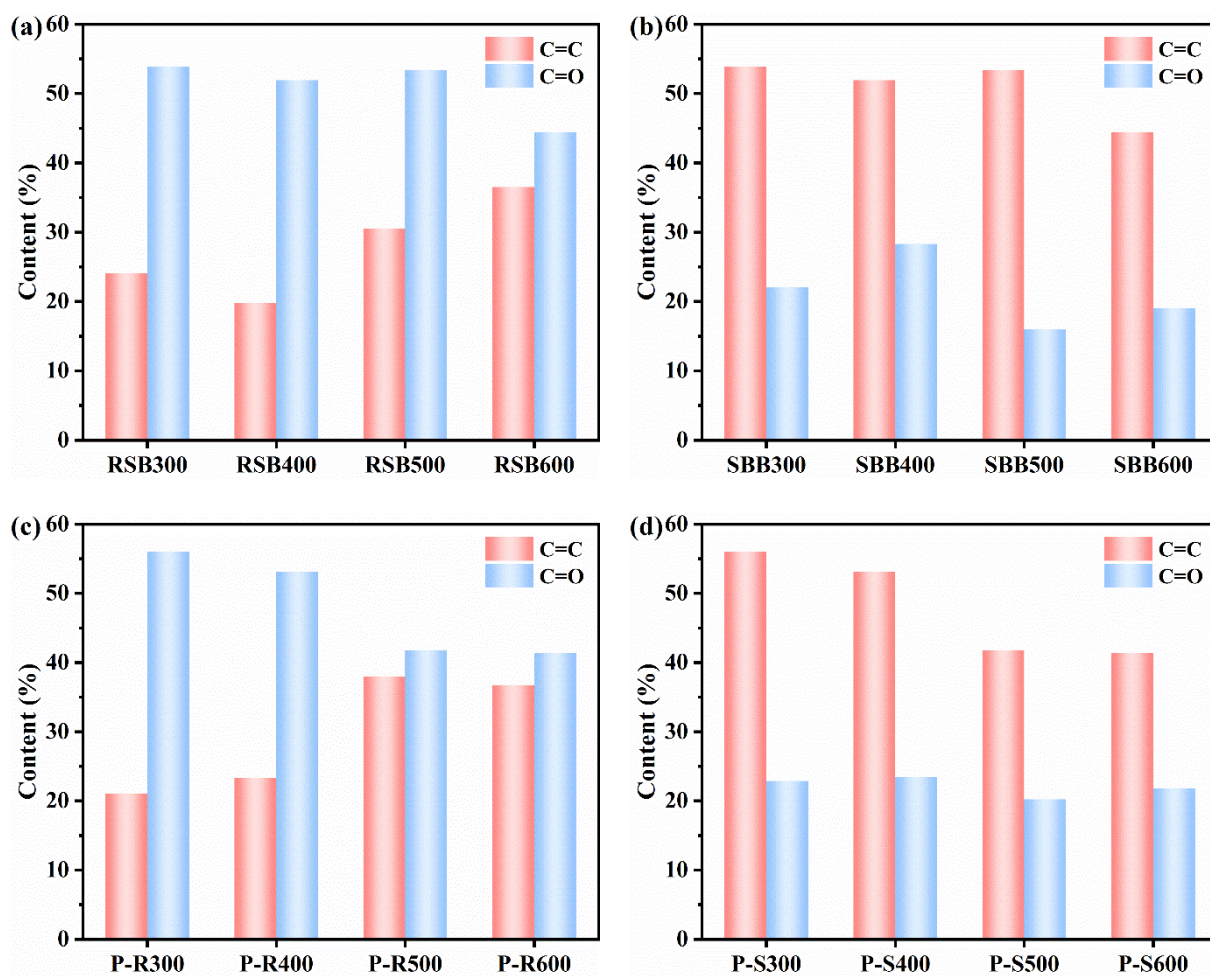

Figure S2 The C=C and C=O distributions of FTIR spectra in the range of 1800-1000  $\text{cm}^{-1}$  were fitted: (a) RSB; (b) SBB; (c) P-R; (d) P-S.

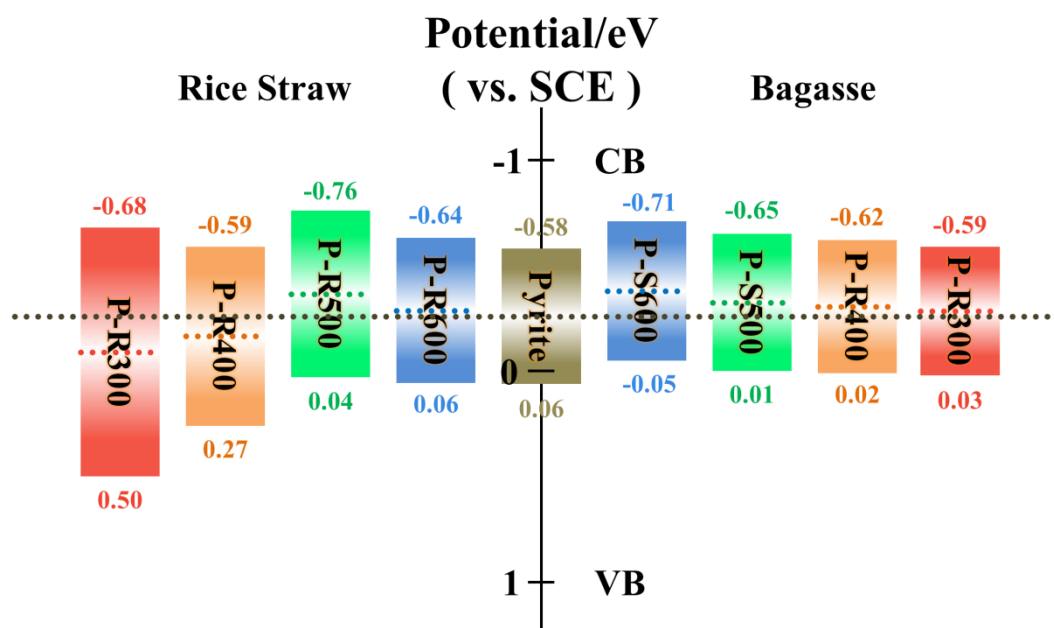

Figure S3 The positions of conduction bands, valence bands and Fermi energy levels of each material (vs. SCE).

Table S1 Corrosion currents of probiochar and pyrite–biochar mixtures.

| Samples | Corrosion potential (V) | Corrosion current ( $\mu\text{A}$ ) |
|---------|-------------------------|-------------------------------------|
| PY      | 0.107                   | 0.171                               |
| P-R300  | -0.383                  | 0.292                               |
| P-R400  | -0.031                  | 0.252                               |
| P-R500  | 0.065                   | 0.119                               |
| P-R600  | 0.037                   | 0.102                               |
| P-S300  | -0.173                  | 0.179                               |
| P-S400  | -0.057                  | 0.226                               |
| P-S500  | 0.065                   | 0.299                               |
| P-S600  | -0.102                  | 0.409                               |

Table S2 pH and elemental contents of biochar and pyrite–biochar mixtures.

| Samples | pH    | Elemental content (%) |      |      |       | Atomic ratio |
|---------|-------|-----------------------|------|------|-------|--------------|
|         |       | C                     | H    | N    | S     | H/C          |
| RSB300  | 8.57  | 45.52                 | 3.58 | 1.53 | 0.20  | 0.94         |
| RSB400  | 9.92  | 46.44                 | 2.95 | 1.53 | 0.28  | 0.76         |
| RSB500  | 10.77 | 46.34                 | 2.10 | 1.51 | 0.36  | 0.54         |
| RSB600  | 10.92 | 47.48                 | 1.53 | 1.28 | 0.32  | 0.39         |
| P-R300  | 2.71  | 25.74                 | 2.15 | 0.82 | 15.79 | 1.00         |
| P-R400  | 3.02  | 12.84                 | 0.84 | 0.40 | 32.38 | 0.79         |
| P-R500  | 5.03  | 16.07                 | 0.70 | 0.50 | 22.66 | 0.52         |
| P-R600  | 5.47  | 11.44                 | 0.37 | 0.31 | 15.56 | 0.39         |
| SBB300  | 4.76  | 61.34                 | 2.97 | 0.89 | 0.52  | 0.58         |
| SBB400  | 4.71  | 58.33                 | 2.90 | 1.15 | 0.52  | 0.60         |
| SBB500  | 5.63  | 64.07                 | 2.23 | 1.02 | 0.41  | 0.42         |
| SBB600  | 6.22  | 61.76                 | 1.80 | 0.95 | 0.33  | 0.35         |
| P-S300  | 2.09  | 36.72                 | 1.41 | 0.49 | 13.59 | 0.46         |
| P-S400  | 2.08  | 27.47                 | 1.37 | 0.55 | 14.87 | 0.60         |
| P-S500  | 2.11  | 34.22                 | 1.45 | 0.71 | 8.22  | 0.51         |
| P-S600  | 2.09  | 23.58                 | 0.85 | 0.69 | 7.87  | 0.43         |

Table S3 Redox potentials and flat band potentials of pyrite and pyrite–biochar mixtures

| <b>Samples</b> | <b>Redox potential (V)</b> | <b>Flat band potential (eV vs. SCE)</b> |
|----------------|----------------------------|-----------------------------------------|
| <b>PY</b>      | -0.50                      | -0.26                                   |
| <b>RSB300</b>  | -0.53                      | -0.04                                   |
| <b>RSB400</b>  | -0.56                      | -0.12                                   |
| <b>RSB500</b>  | -0.58                      | -0.49                                   |
| <b>RSB600</b>  | -0.59                      | -0.44                                   |
| <b>SBB300</b>  | -0.56                      | -0.45                                   |
| <b>SBB400</b>  | -0.51                      | -0.55                                   |
| <b>SBB500</b>  | -0.52                      | -0.62                                   |
| <b>SBB600</b>  | -0.55                      | -0.71                                   |
| <b>P-R300</b>  | -0.41                      | -0.09                                   |
| <b>P-R400</b>  | -0.50                      | -0.16                                   |
| <b>P-R500</b>  | -0.57                      | -0.36                                   |
| <b>P-R600</b>  | -0.53                      | -0.29                                   |
| <b>P-S300</b>  | -0.41                      | -0.28                                   |
| <b>P-S400</b>  | -0.46                      | -0.30                                   |
| <b>P-S500</b>  | -0.48                      | -0.32                                   |
| <b>P-S600</b>  | -0.43                      | -0.38                                   |
